# Supplementary material
Source: HighWire-hosted journal article supplement (https://www.cmaj.ca/highwire/filestream/57768/field_highwire_adjunct_files/0/image-balestri-at-1.pdf)
Supplement: image-balestri-at-1.pdf [file image-balestri-at-1.pdf]

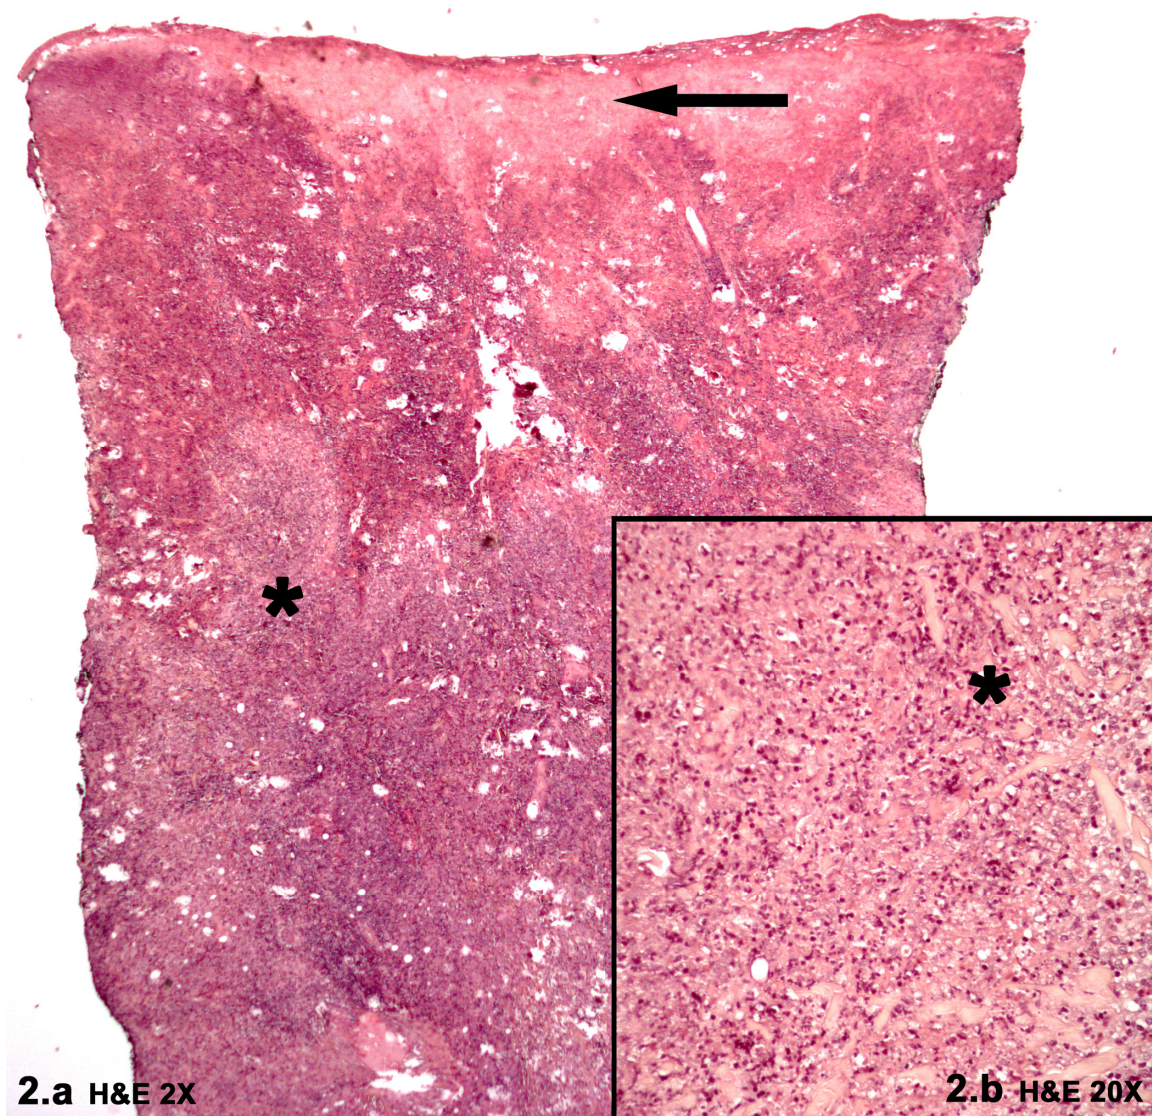

**Appendix 1:** (A) Histologic image showing epidermal necrosis (arrow), dense inflammatory suppurative infiltrate that was diffusely distributed (asterisk), and complete absence of adnexal structures in the dermis and adipose tissue (hematoxylin–eosin, original magnification  $\times 2$ ). (B) Dense inflammatory suppurative infiltrate (asterisk) (hematoxylin–eosin, original magnification  $\times 20$ ).
